# Supplementary material for: A facile approach to fabricate three-dimensional ordered macroporous rutile titania at low calcination temperature
Source: Royal Society of Chemistry journal article supplement (doi:10.1039/c1jm14319k), 2011-12-23
Supplement: c1jm14319k.pdf [file c1jm14319k.pdf]

## **Electronic Supplementary Information**

### **A facile approach to fabricate three-dimensional ordered macroporous rutile titania at low calcination temperature**

Fei Jia, Wei Sun, Junhu Zhang,\* Yunfeng Li and Bai Yang

State Key Laboratory of Supramolecular Structure and Materials, College of Chemistry, Jilin University,  
Changchun, P. R. China.

\* Corresponding author email: [zjh@jlu.edu.cn](mailto:zjh@jlu.edu.cn) ;

Fax: +86-0431-85193423; Tel: +86-431-85168283

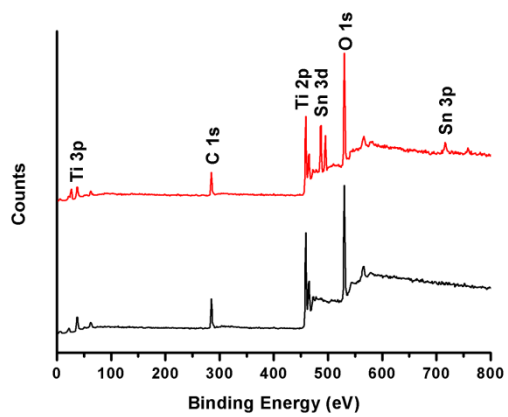

**Fig. S1.** XPS survey spectra of the Sn-doped (upper) and undoped (lower) samples showing the elements detected.
